# Supplementary material
Source: PubMed Central journal article supplement (PMC8356802)

## Supplemental Information

### Ring neurons may also communicate with the E-PGs via wake-promoting neuropeptides

The R4d ring neurons expressed mRNA for the Dh31 neuropeptide (Figure S4B, adjusted  $p = 3.4E-21$ ), while the E-PG neurons expressed mRNA for the Dh31 receptor (Figure S4B, adjusted  $p = 0.10$ ). Dh31 has previously been linked to the ellipsoid body and is associated with wake promotion as part of the circadian rhythm (Kunst et al., 2014).

### Electrical isolation of the EB and PB and unique partners within those regions can explain the P-EN2 activity

To probe the source of the differences in observed calcium activity in the P-EN2s between the EB and the PB, we turned to passive cable theory simulations of P-EN2 neurons. We injected current from 3 fictive spikes into  $\Delta 7$  synapse locations in the PB and observed how potentials propagated along the arbors. Sites within the PB quickly reached equipotential, and voltage losses within the region were minimal. In contrast, sites within the EB experienced only a slight depolarization in response to these current injections, suggesting that the two compartments are electrically isolated (Figure S11M). The P-EN2 activity in the EB may therefore primarily reflect the direct contribution from the P-EGs (Figure S11N) while the activity in the PB would reflect a direct contribution from the  $\Delta 7$ s. The PB P-EN2 activity may only enter the EB when it overcomes some threshold, say when additional current is injected. The P-EN2 activity is tuned to rotational velocities (Green et al., 2017), and thus strong turns may lead to such an additional current source. The super-threshold PB activity would then travel to the EB, leading to a growing

"uj qwrft"qh'R/GP 4"GD"cevkxk\{ "cvj ki j "tqcvkqpcrd'xgmekkgu0Kpf ggf . 'y g'ugg'uwej "c"uj qwrft"lp"  
yj gug"eqpf kxqpu"  
"

Figure S1

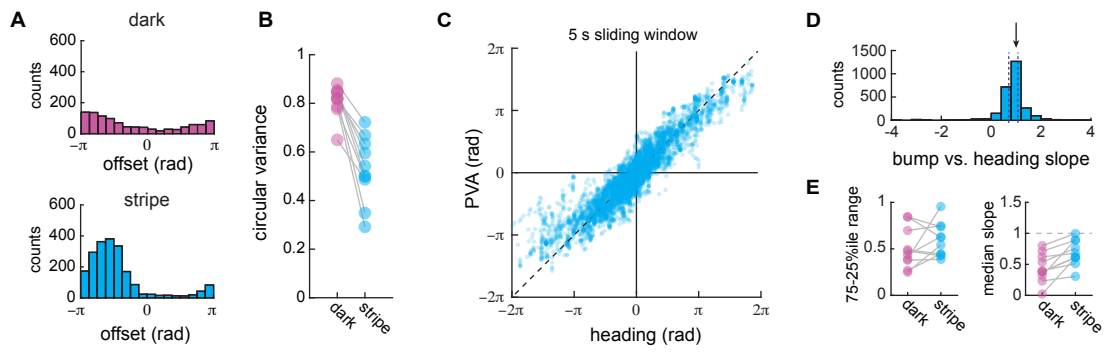

Figure S2

Figure S2

A

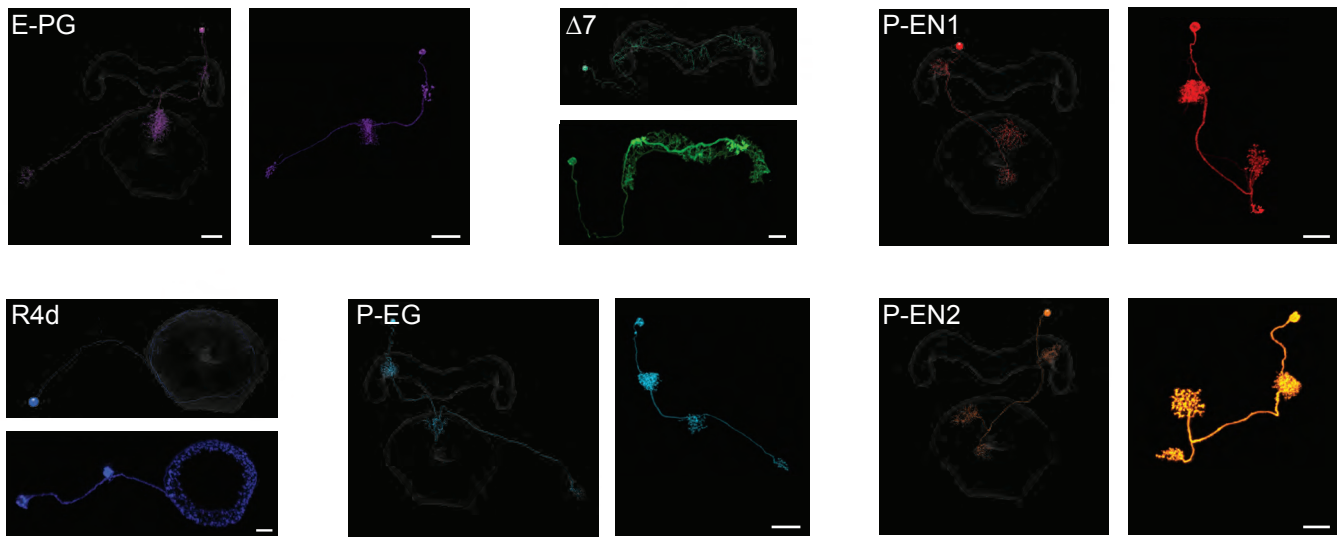

B

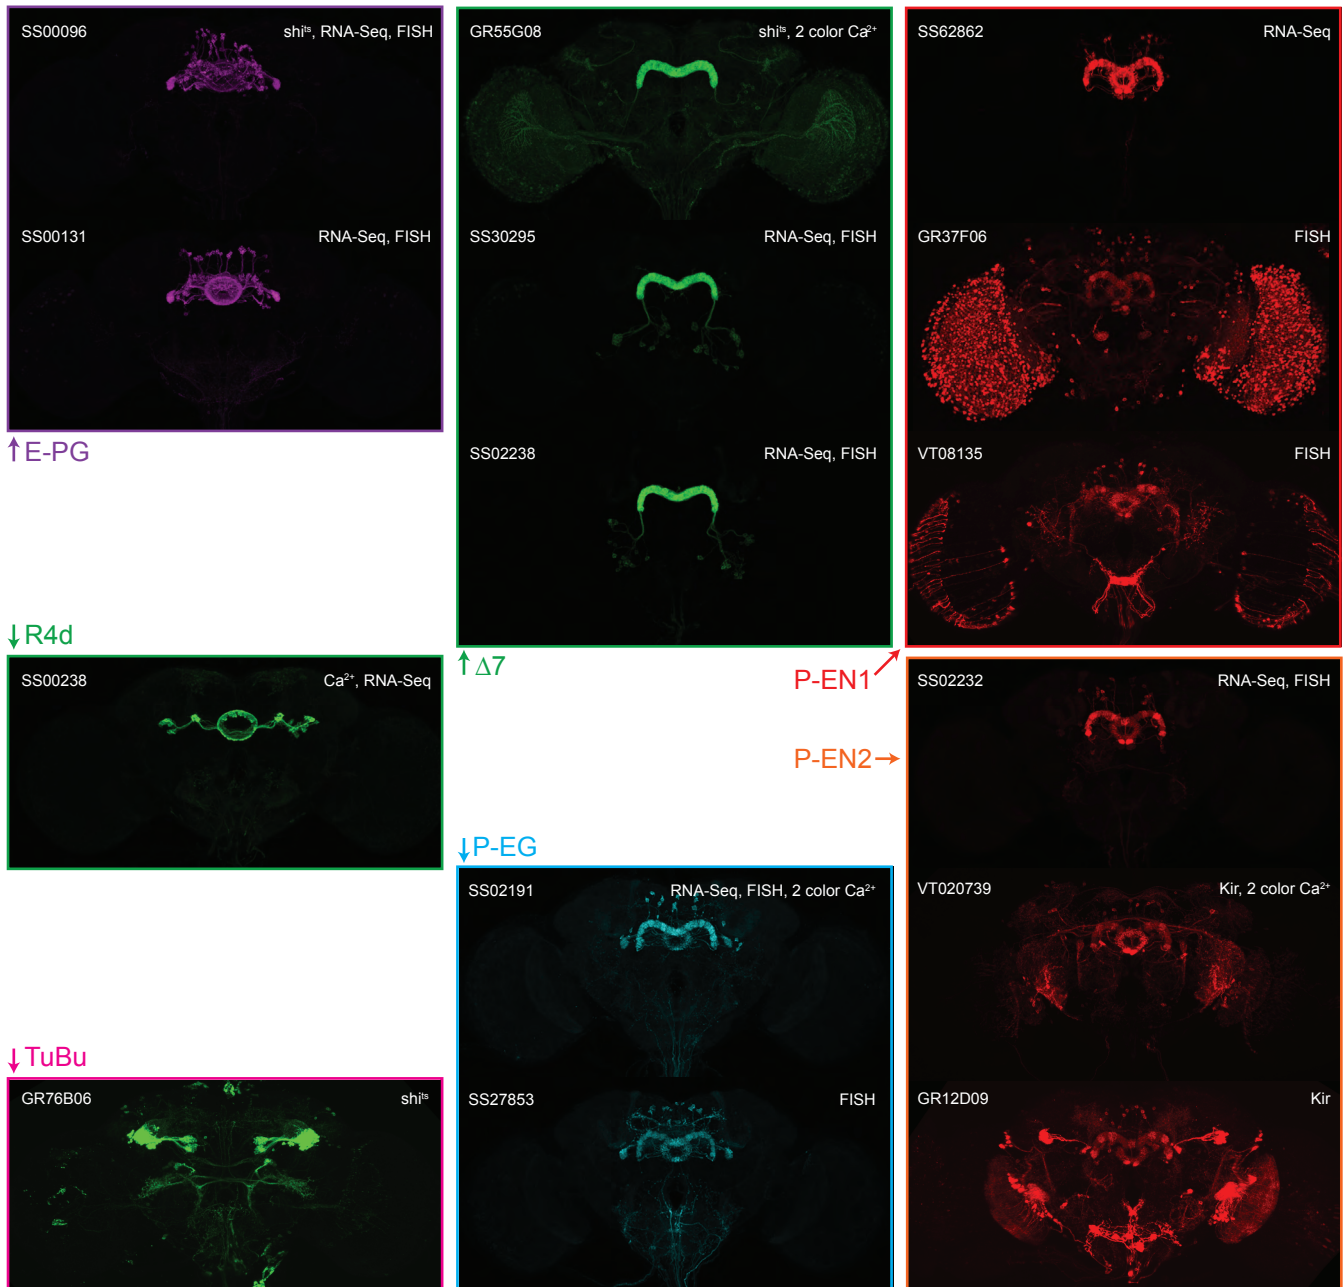

Figure S3

Extrapolated partners:  
(estimated total # of neurons)

- Δ7 (40)
- E-PG (54)
- P-EN1 (16)
- R (100)
- P-EG (16)
- P-EN2 (16)

EB

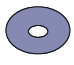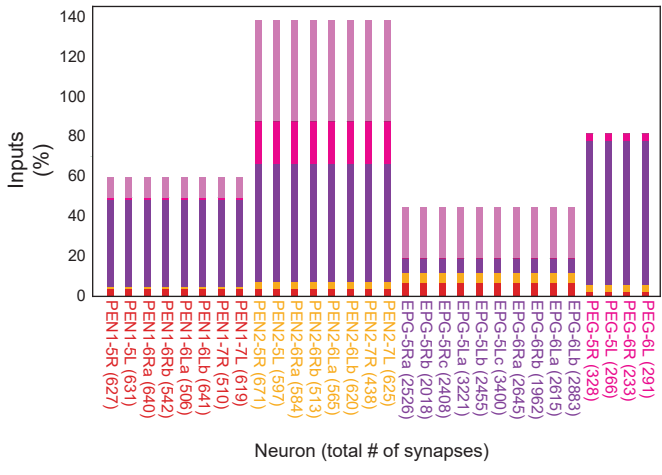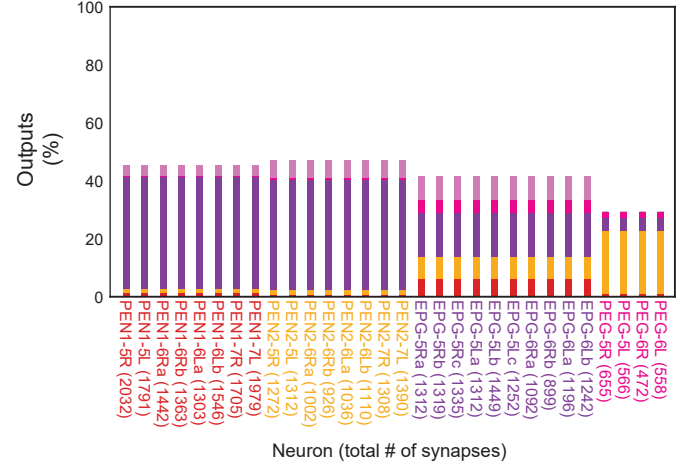

PB

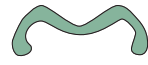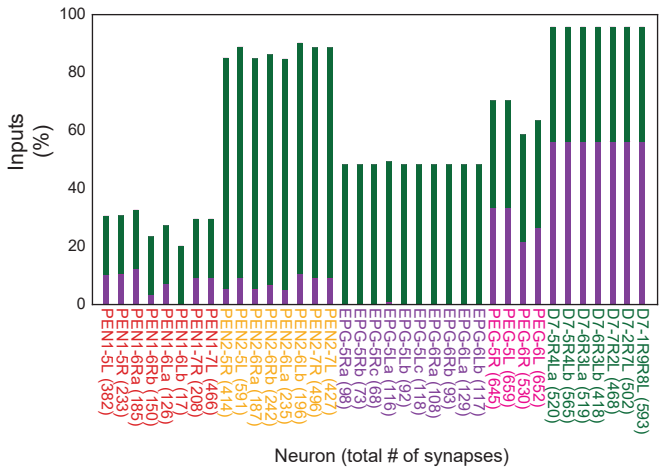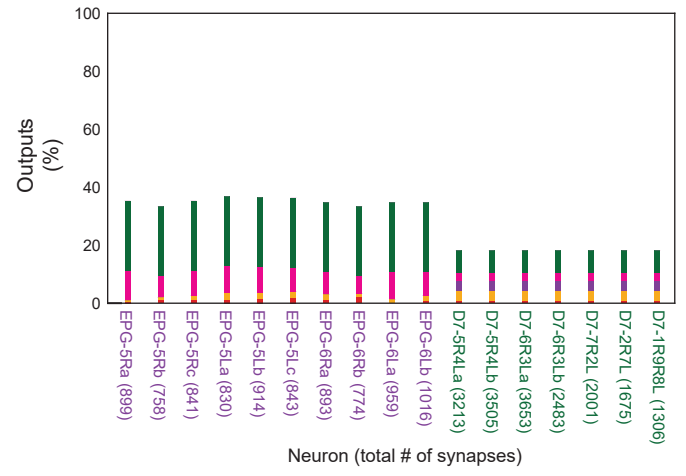

NO

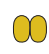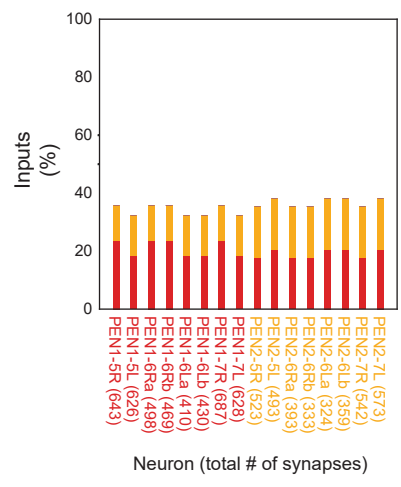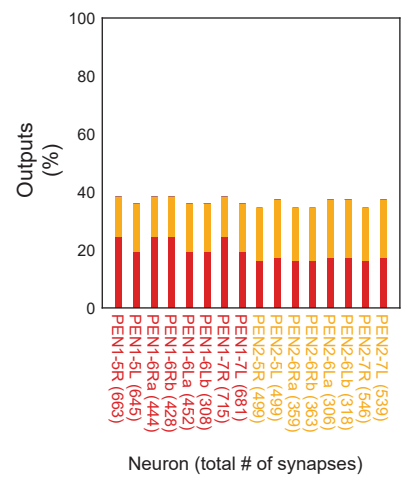

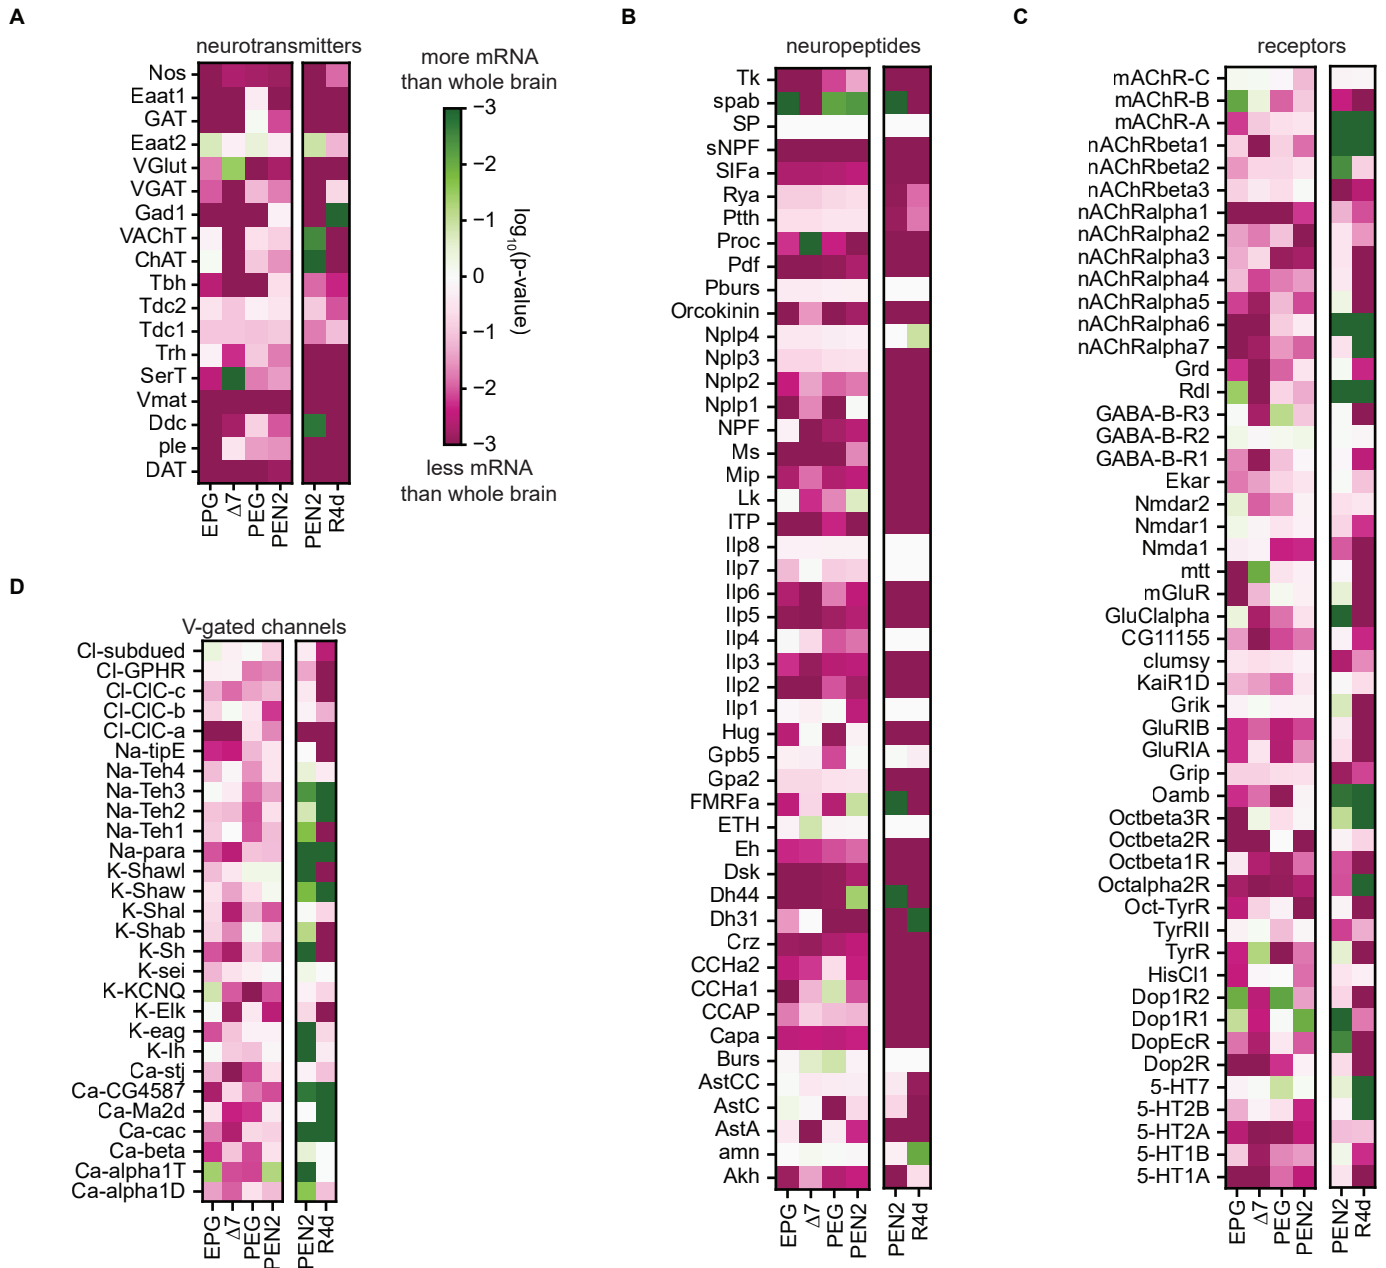

Figure S5

Figure S5

A

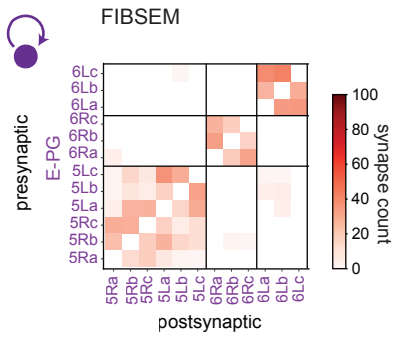

B

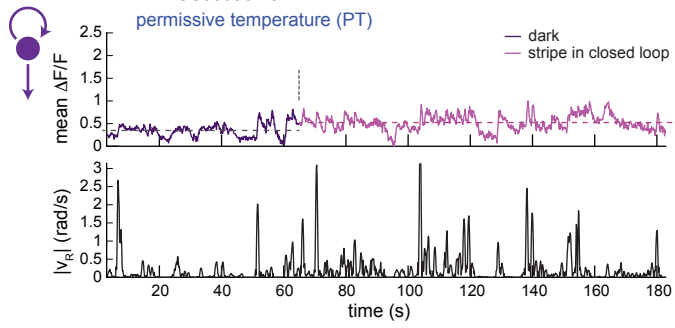

C

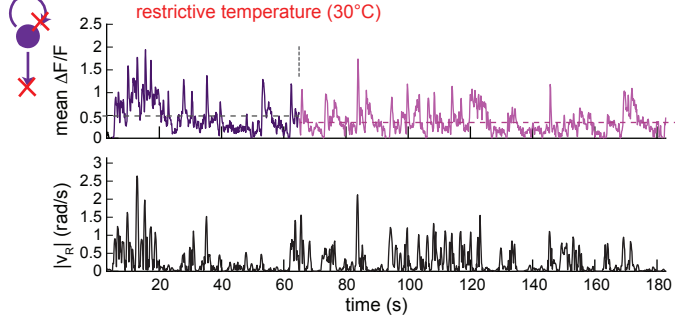

D

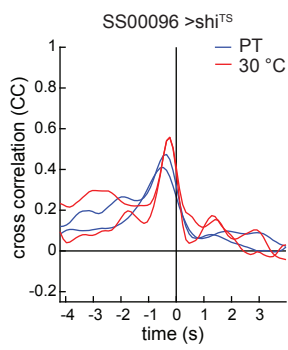

E

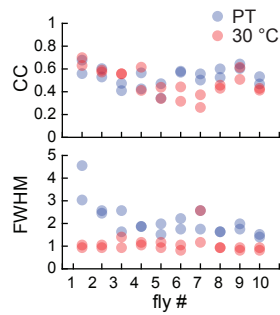

F

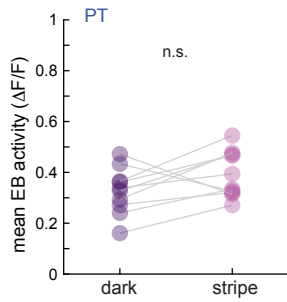

G

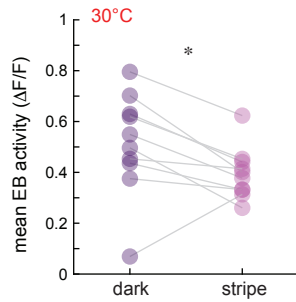

Figure S6  
Figure S6

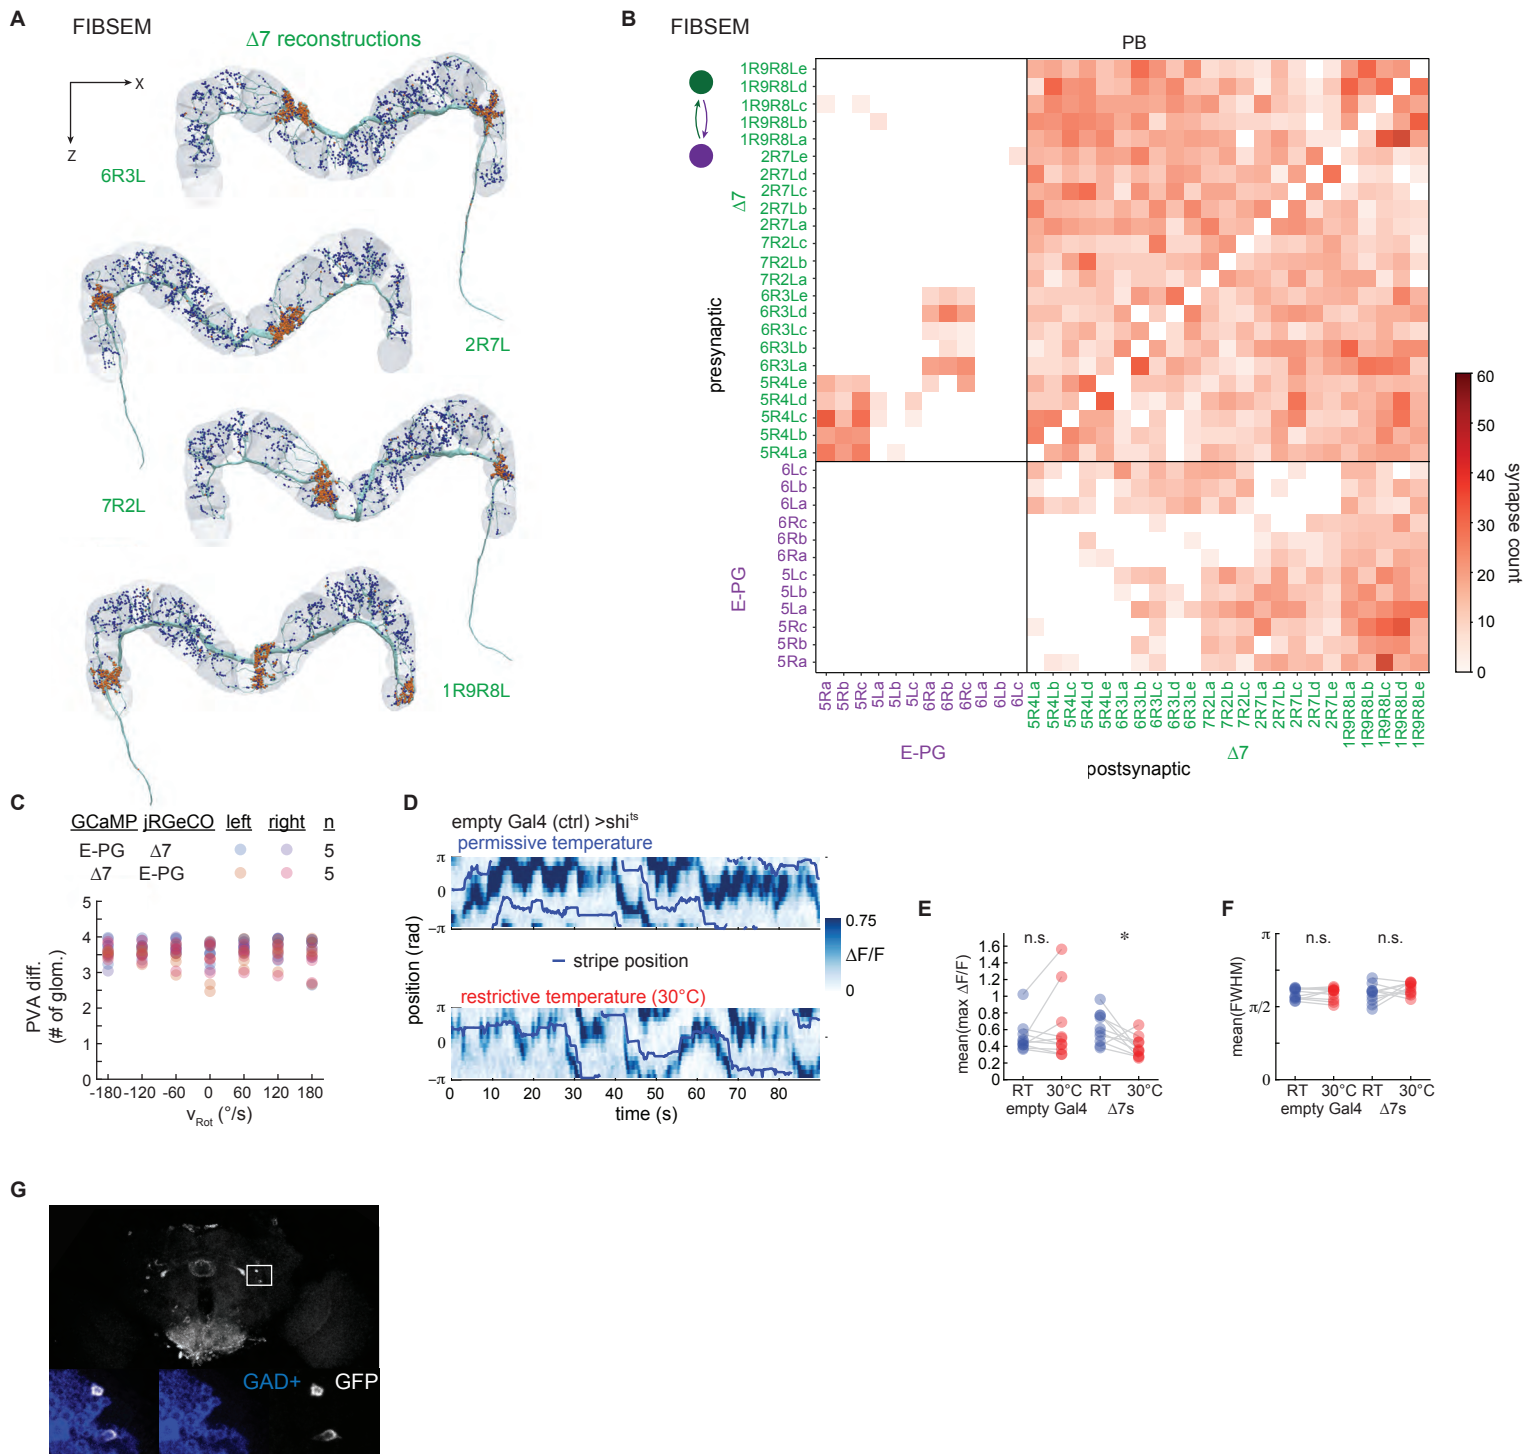

Figure S7  
Figure S7

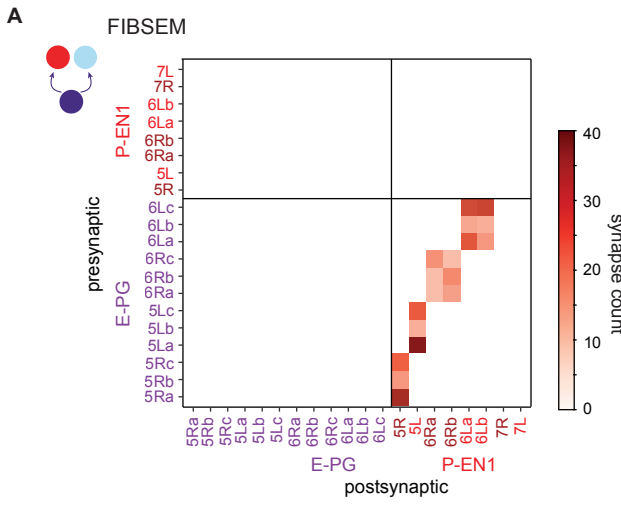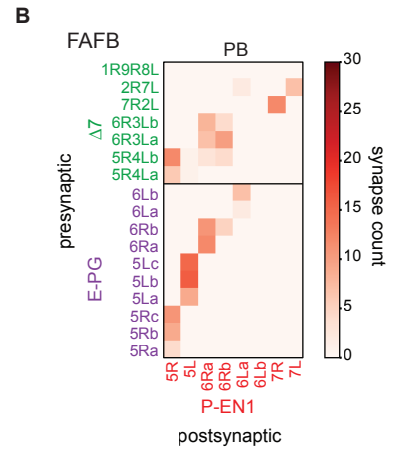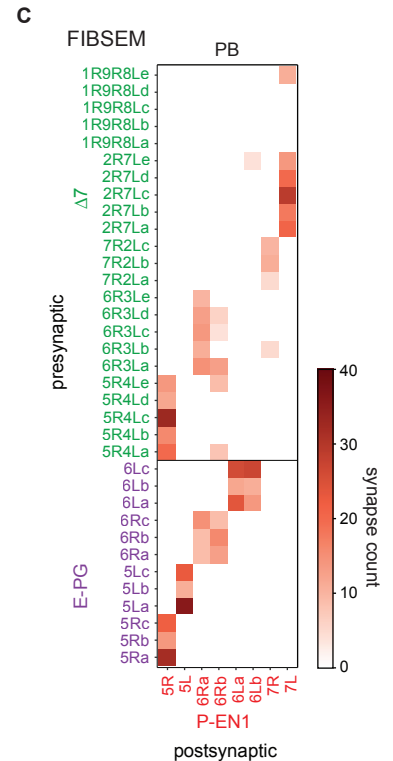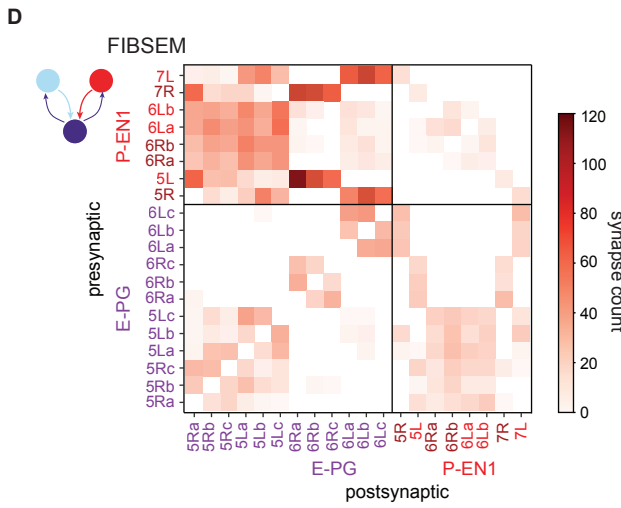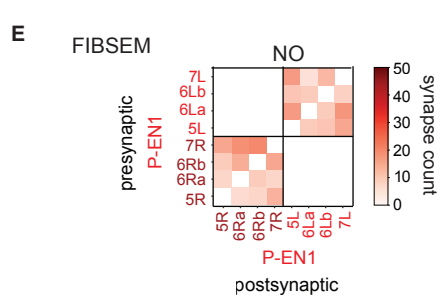



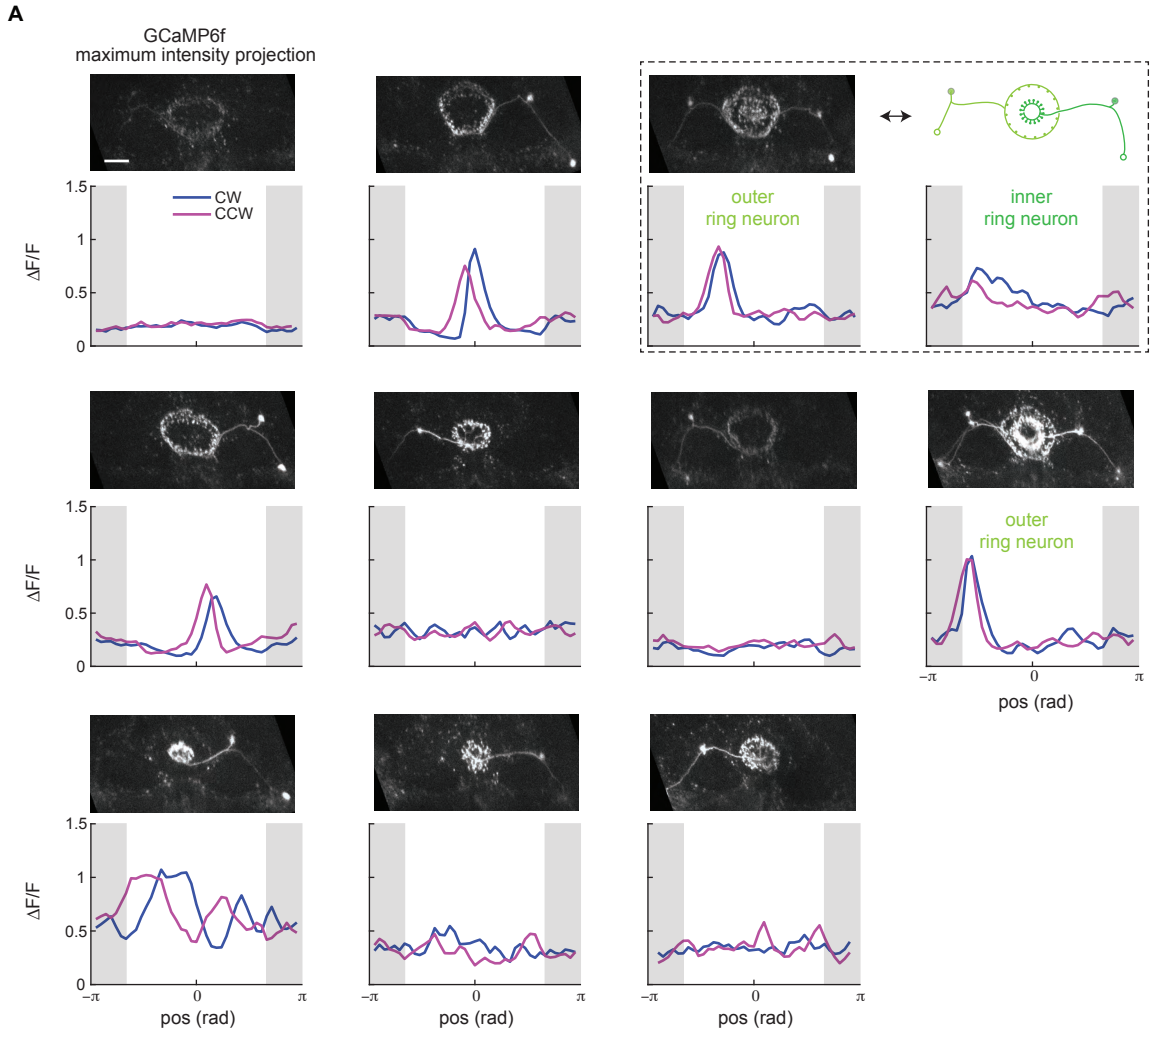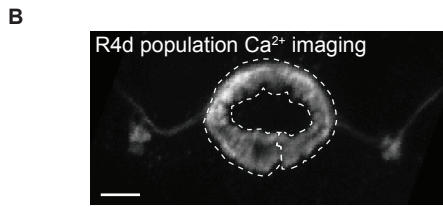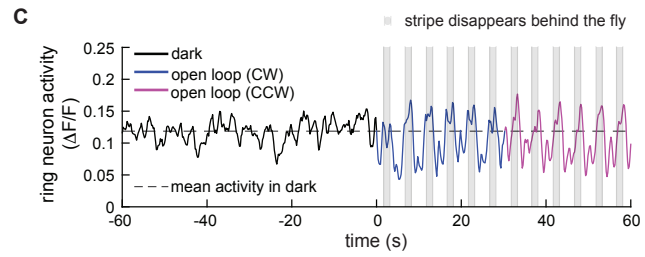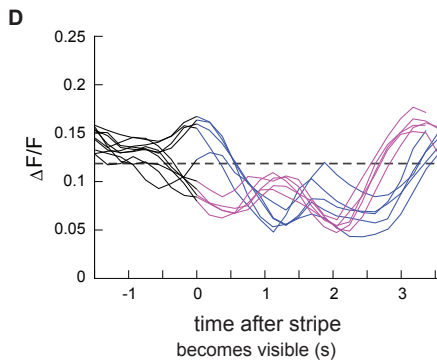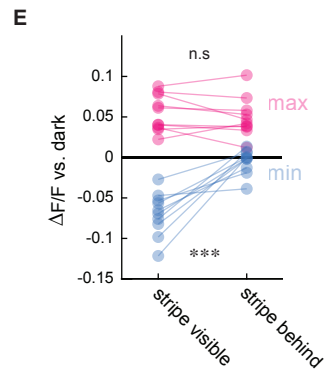

Figure S9

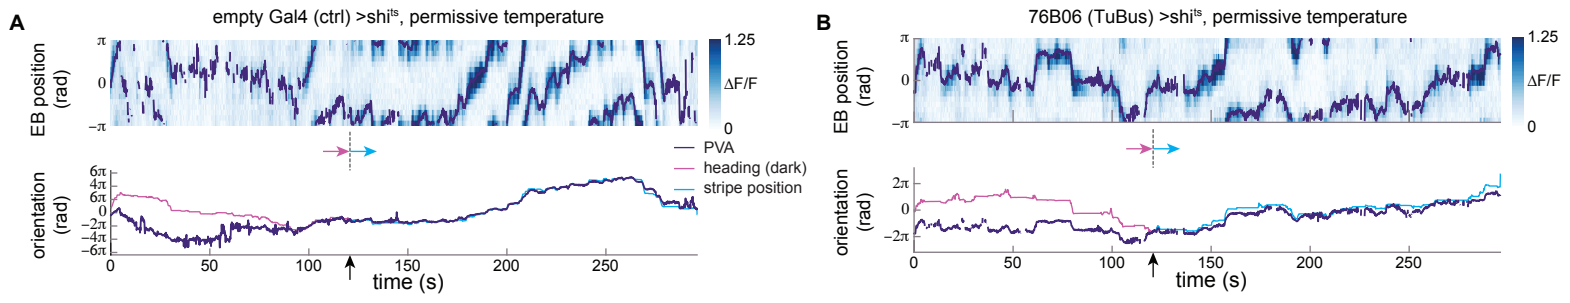

Figure S10

Figure S10

A

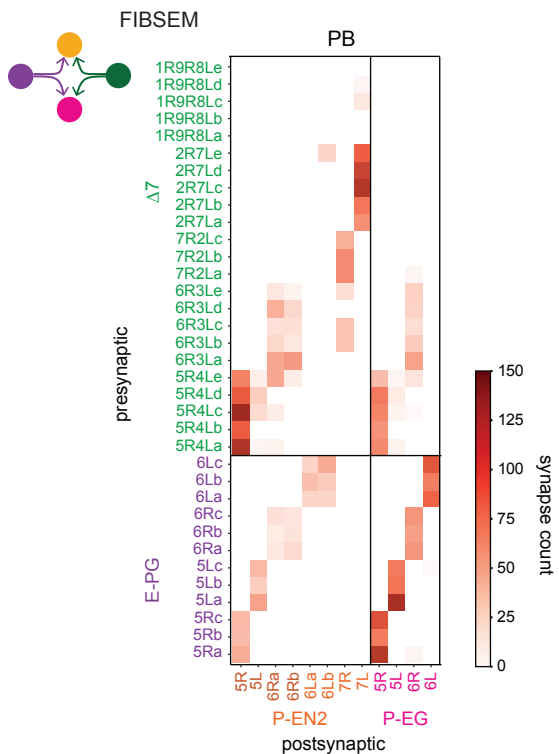

B

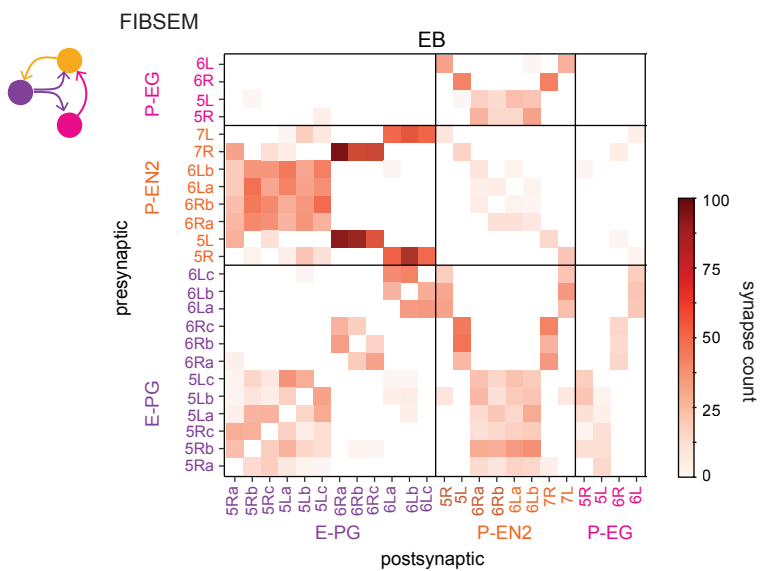

C

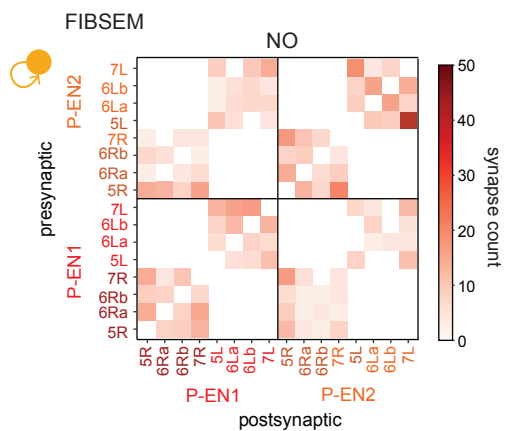

Figure S11

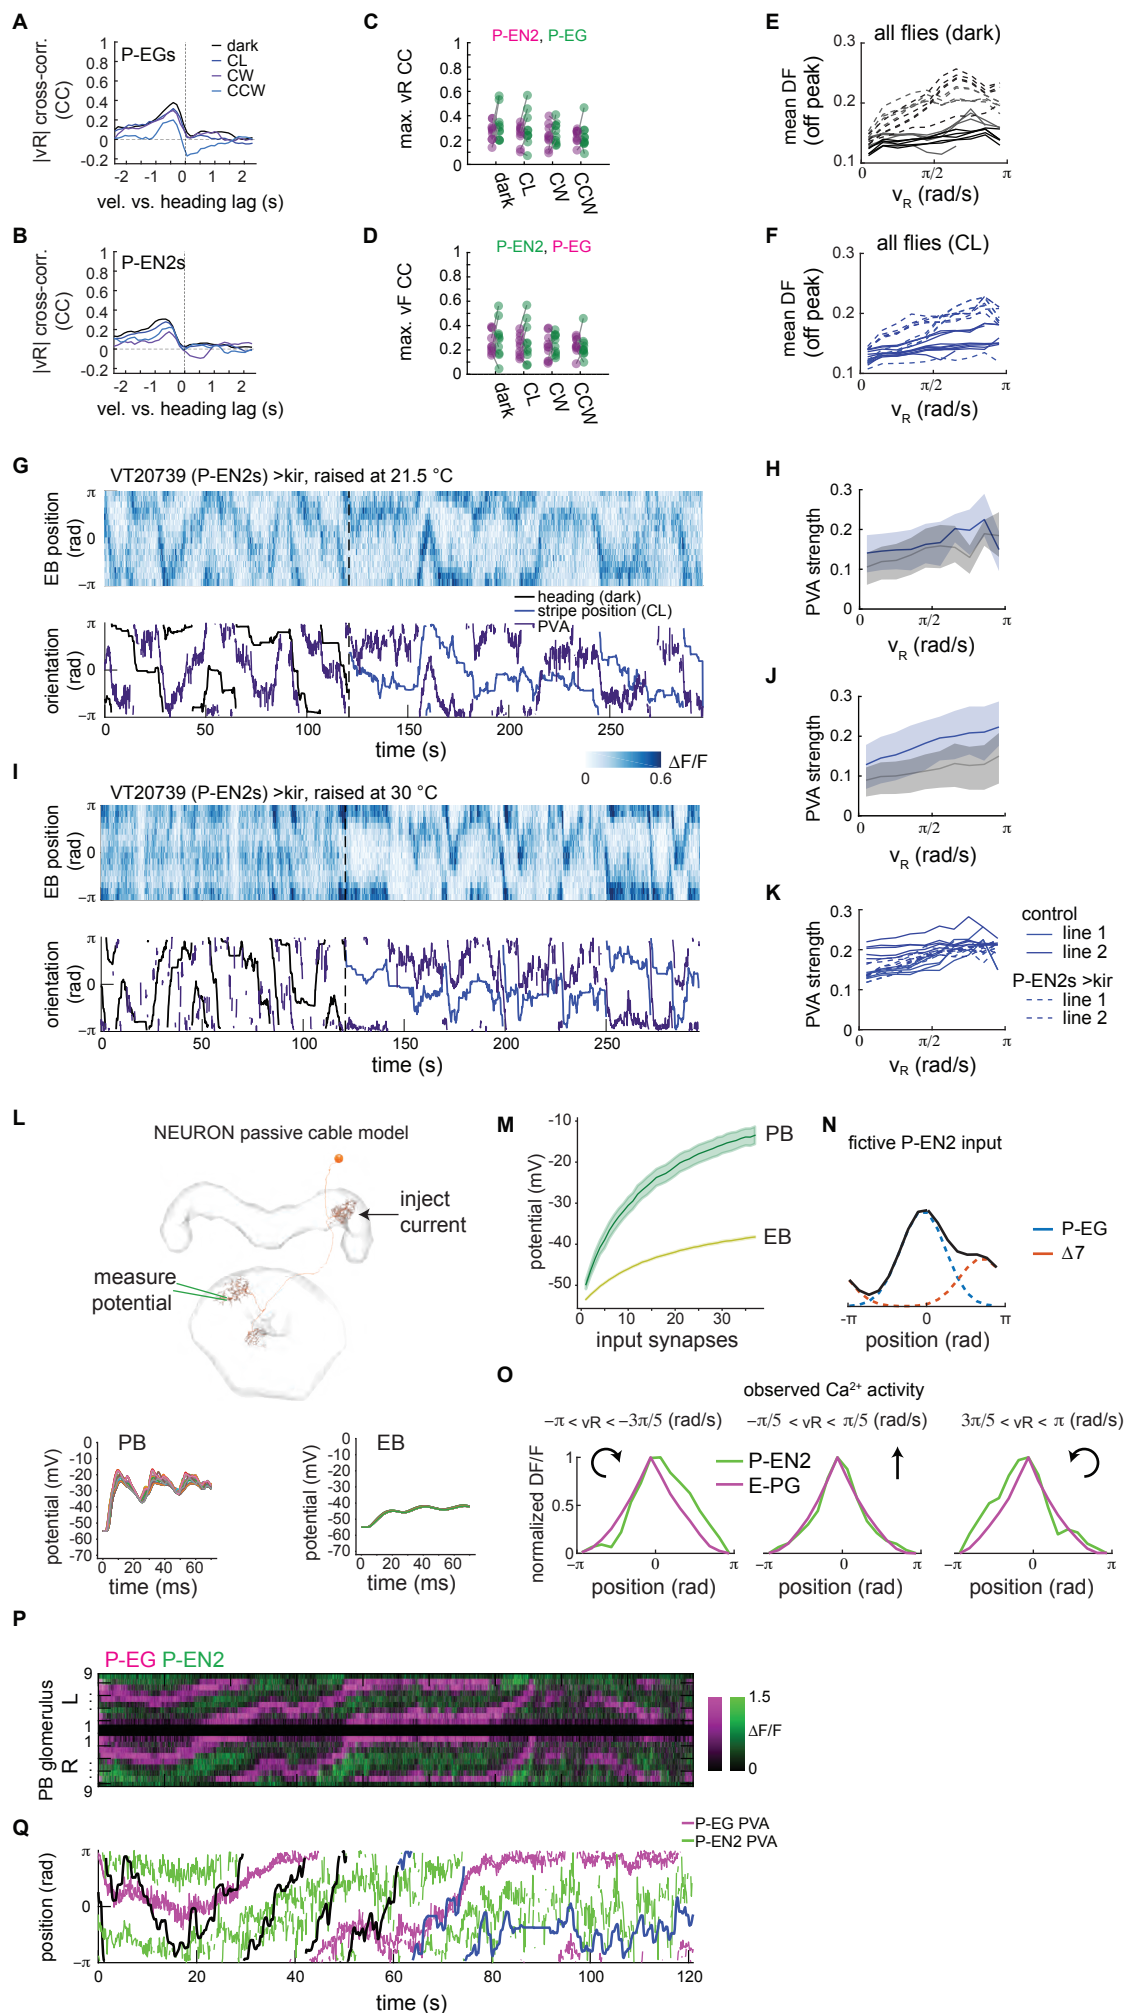

Figure S12

Figure S12

closed-loop behavior

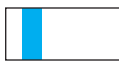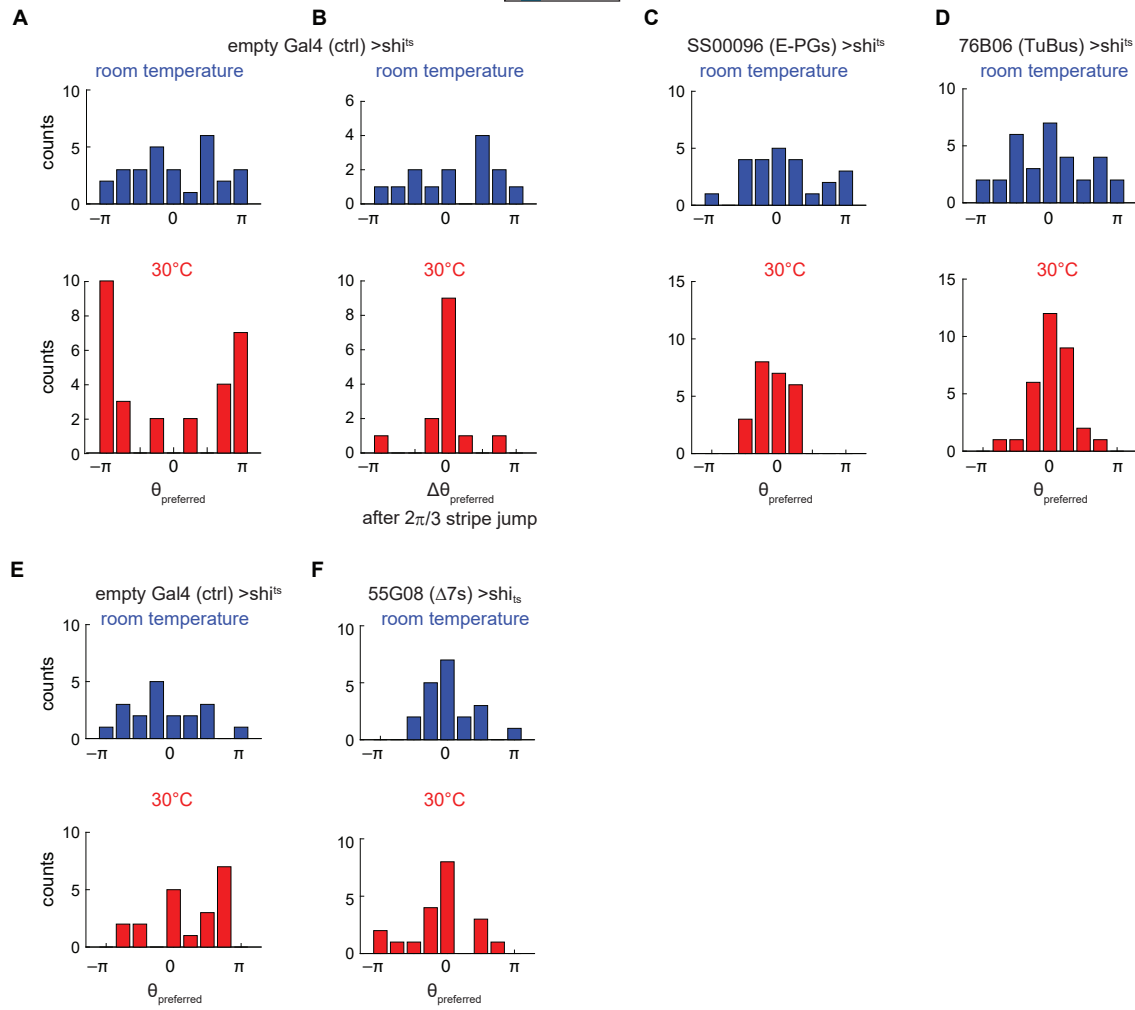

Figure S13

Figure S13

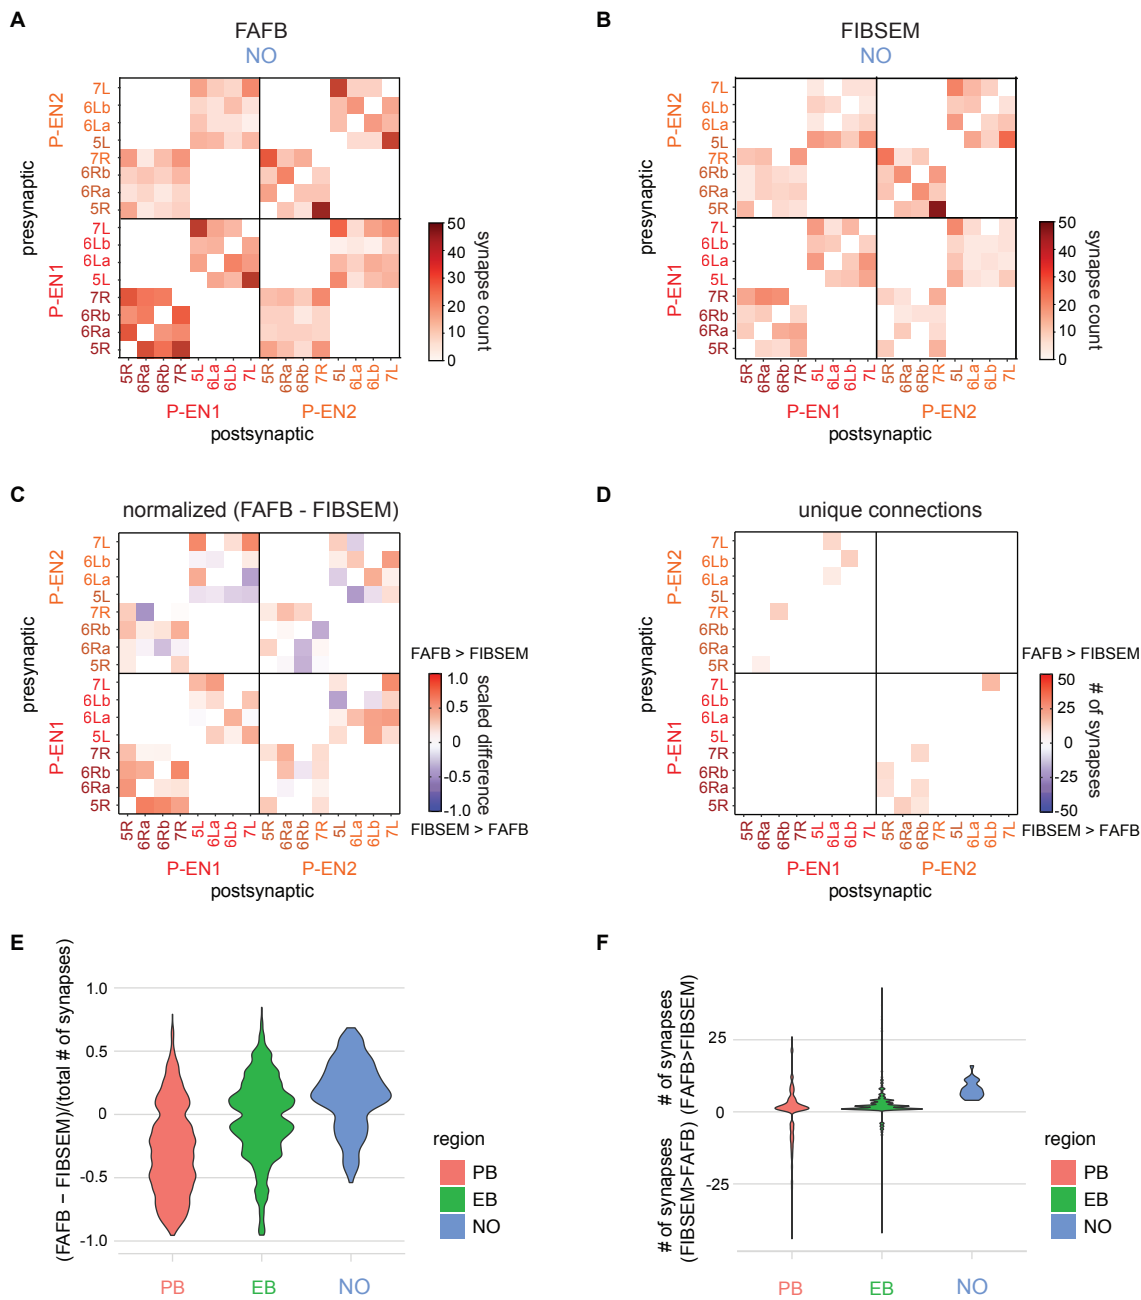

Supplement: NIHMS1728922-supplement-1.pdf [file NIHMS1728922-supplement-1.pdf]
